# Supplementary material
Source: ML conference proceedings conference paper supplement (https://openaccess.thecvf.com/content/WACV_2020/html/Ramachandra_Street_Scene_A_WACV_2020_paper.html)
Supplement: Supplementary file 1 [file Ramachandra_Street_Scene_A_WACV_2020_supplemental.pdf]

# Street Scene: A new dataset and evaluation protocol for video anomaly detection

Bharathkumar Ramachandra  
North Carolina State University  
Raleigh, NC 27695  
bramach2@ncsu.edu

Michael J. Jones  
Mitsubishi Electric Research Labs (MERL)  
201 Broadway, 8th floor; Cambridge, MA 02478  
mjones@merl.com

## 1. More Detection Result Visualizations

We show more examples of our detection results using our flow-based algorithm with  $T = 4$  frames in Figures 1 through 9. In each of the frames shown, the red tinted pixels are detected as anomalous by our algorithm. The blue rectangles show the ground truth annotations in each frame.

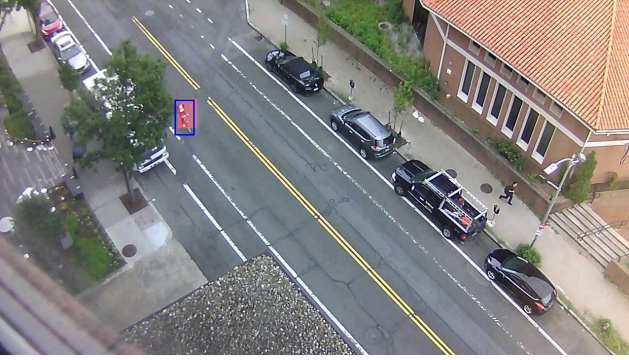

Figure 1: Detection result for flow-based method showing correctly detected biker outside of the bike lane.

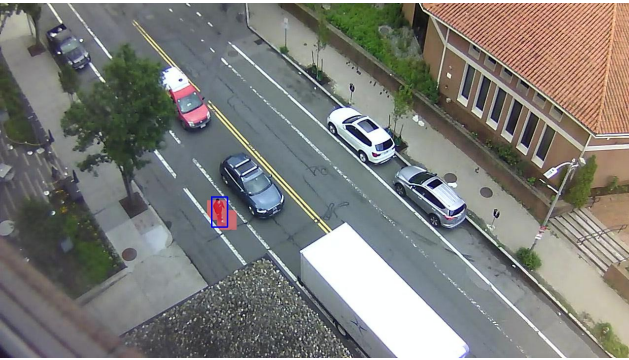

Figure 2: Detection result for flow-based method showing correctly detected skateboarder in a bike lane.

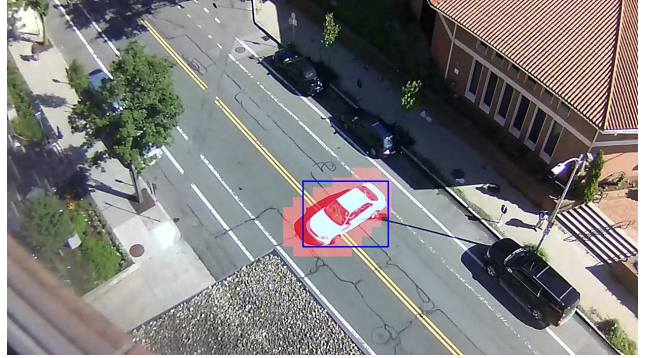

Figure 3: Detection result for flow-based method showing correctly detected car u-turn.

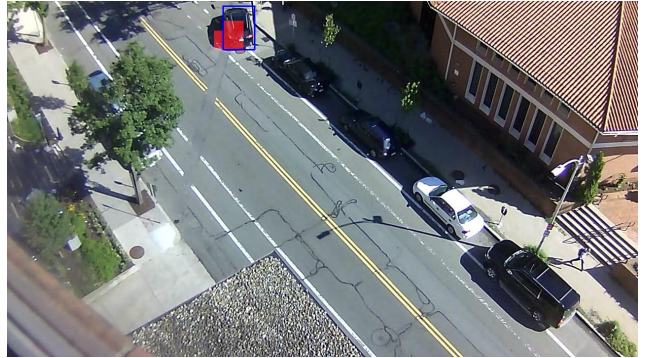

Figure 4: Detection result for flow-based method showing correctly detected illegal parking.

## 2. Results of baseline algorithms on UCSD Ped1 and Ped2

The baseline video anomaly detection method described in the paper is not the focus of this paper and is not claimed to be superior to the current state of the art on existing datasets. The purpose is to provide reasonable baseline results on Street Scene for future work to compare against since the available implementations of previous algorithms do not perform well on Street Scene. However, readers may be interested in how our exemplar-based algorithm per-



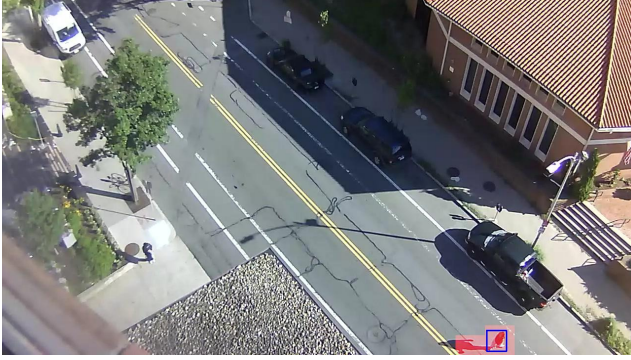

Figure 5: Detection result for flow-based method showing correctly detected jaywalker.

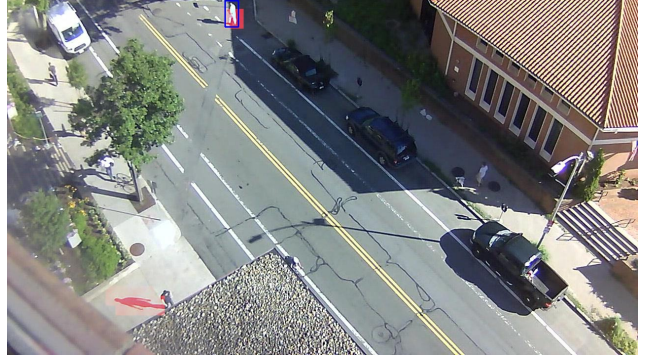

Figure 8: Detection result for flow-based method showing correctly detected jaywalker as well as a false positive.

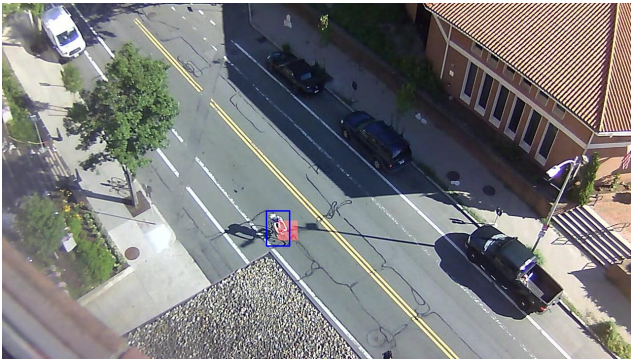

Figure 6: Detection result for flow-based method showing correctly detected biker outside of the bike lane.

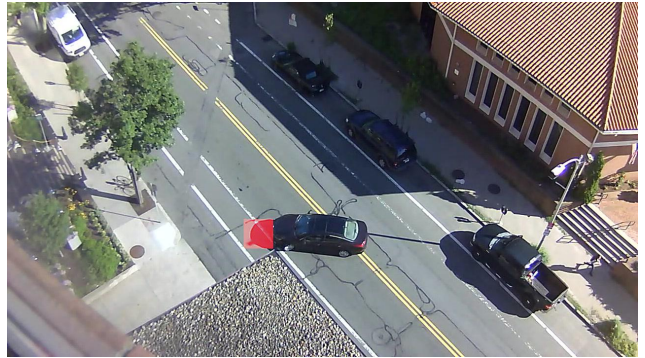

Figure 9: Detection result for flow-based method showing a false positive caused by a shadow of a car.

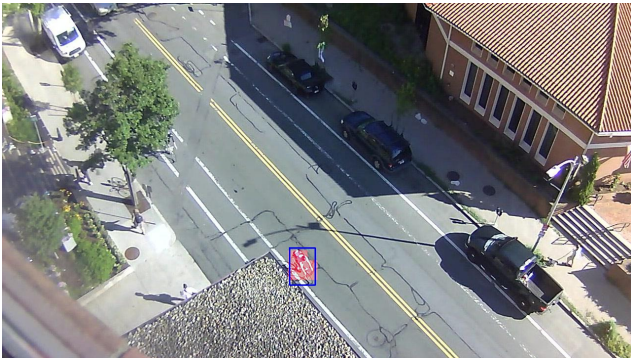

Figure 7: Detection result for flow-based method showing correctly detected biker outside of the bike lane.

forms on existing datasets. Table 1 shows results for our foreground baseline algorithm on UCSD Ped1 and Ped2 datasets using the traditional frame-level and pixel-level criteria. We also show results from other recent papers for comparison. Our results are comparable to many recent results especially using the pixel-level criterion.

### 3. Detailed List of Anomalies in Street Scene

Tables 2 and 3 list every annotated anomaly in the Street Scene dataset for all 35 testing videos. This list will be included with the dataset when it is publicly released (along with the ground truth bounding boxes for all frames). The lists give a good sense of what is contained in the data set. It is purely for informative purposes. The anomaly types are not used in the evaluation criteria.

### References

- [1] B. Antic and B. Ommer. Video parsing for abnormality detection. In *IEEE International Conference on Computer Vision (ICCV)*, pages 2415–2422. IEEE, Nov. 2011. 3
- [2] B. Antic and B. Ommer. Spatio-temporal Video Parsing for Abnormality Detection. *arXiv preprint arXiv:1502.06235*, 2015. 3
- [3] M. Hasan, J. Choi, J. Neumann, A. Roy-Chowdhury, and L. Davis. Learning temporal regularity in video sequences. In *IEEE Conference on Computer Vision and Pattern Recognition (CVPR)*, 2016. 3
- [4] W. Li, V. Mahadevan, and N. Vasconcelos. Anomaly detection and localization in crowded scenes. *IEEE Transactions on Pattern Analysis and Machine Intelligence (PAMI)*, 2014. 3

| Method                | Ped1 Frame-level |       | Ped1 Pixel-level |       | Ped2 Frame-level |       | Ped2 Pixel-level |       |
|-----------------------|------------------|-------|------------------|-------|------------------|-------|------------------|-------|
|                       | AUC              | EER   | AUC              | EER   | AUC              | EER   | AUC              | EER   |
| Dictionary method [5] | 91.8%            | 15%   | 63.8%            | 43%   | -                | -     | -                | -     |
| Autoencoder [3]       | 81.0%            | 27.9% | -                | -     | 90.0%            | 21.7% | -                | -     |
| AMDN [7]              | 92.1%            | 16%   | 67.2%            | 40.1% | 90.8%            | 17%   | -                | -     |
| MDT [4]               | 81.8%            | 25%   | 44.1%            | 58.0% | 85.0%            | 25%   | 44.0%            | -     |
| Video parsing [1]     | 91.0%            | 18%   | 83.6%            | 23%   | 92.0%            | 14%   | -                | -     |
| ST Video parsing [2]  | 93.9%            | 12.9% | 84.2%            | 20.5% | 94.6%            | 10.6% | 81.1%            | 11.2  |
| Plug and play CNN [6] | 95.7%            | 8%    | 64.5%            | -%    | 88.4%            | 18%   | -                | -     |
| Our FG Baseline       | 77.3%            | 25.9% | 69.3%            | 39.4% | 88.3%            | 18.9% | 83.9%            | 23.5% |

Table 1: Traditional frame-level and pixel-level results on UCSD Ped1 and Ped2.

| Test video | Anomaly Index | Anomaly Type              | Test video | Anomaly Index | Anomaly Type                   | Test video | Anomaly Index | Anomaly Type                  |
|------------|---------------|---------------------------|------------|---------------|--------------------------------|------------|---------------|-------------------------------|
| Test001    | 1             | Jaywalk                   | Test009    | 1             | Biker outside lane             | Test015    | 4             | Biker outside lane            |
|            | 2             | Worker in bushes          |            | 2             | Biker outside lane             |            | 5             | Jaywalk                       |
| Test002    | 1             | Person opening trunk      | Test010    | 3             | Biker on sidewalk              |            | 6             | Biker outside lane            |
|            | 2             | Loitering                 |            | 1             | Car u-turn                     |            | 7             | Biker outside lane            |
|            | 3             | Loitering                 |            | 2             | Car Illegally parked           |            | 8             | Biker outside lane            |
|            | 4             | Loitering                 |            | 3             | Jaywalk                        |            | 9             | Biker outside lane            |
|            | 5             | Jaywalk                   |            | 4             | Biker outside lane             | Test016    | 1             | Jaywalk                       |
|            | 6             | Jaywalk                   |            | 5             | Jaywalk                        |            | 2             | Biker outside lane            |
|            | 7             | Jaywalk                   |            | 6             | Jaywalk                        |            | 3             | Biker outside lane            |
| Test003    | 1             | Jaywalk                   | Test011    | 1             | Loitering                      | Test017    | 1             | Dog                           |
|            | 2             | Jaywalk                   |            | 2             | Car u-turn                     |            | 2             | Loitering                     |
|            | 3             | Jaywalk                   |            | 3             | Biker outside lane             |            | 3             | Loitering                     |
| Test004    | 1             | Car u-turn                |            | 4             | Biker outside lane             |            | 4             | Jaywalk                       |
|            | 2             | Jaywalk                   |            | 5             | Biker outside lane             |            | 5             | Jaywalk                       |
|            | 3             | Car outside lane          |            | 6             | Jaywalk                        |            | 6             | Jaywalk                       |
|            | 4             | Jaywalk                   |            | 7             | Car illegally parked           |            | 7             | Pedestrian reverses direction |
|            | 5             | Jaywalk                   |            | 8             | Jaywalk                        |            | 8             | Loitering                     |
| Test005    | 1             | Loitering                 |            | 9             | Biker outside lane             |            | 9             | Jaywalk                       |
|            | 2             | Dog                       |            | 10            | Jaywalk                        |            | 10            | Loitering                     |
|            | 3             | Loitering                 | Test012    | 1             | Loitering                      |            | 11            | Dog                           |
|            | 4             | Loitering                 |            | 2             | Loitering                      |            | 12            | Loitering                     |
|            | 5             | Jaywalk                   |            | 3             | Car u-turn                     |            | 13            | Biker outside lane            |
|            | 6             | Loitering                 |            | 4             | Biker outside lane             | Test018    | 1             | Biker outside lane            |
|            | 7             | Loitering                 |            | 5             | Loitering                      |            | 2             | Biker outside lane            |
|            | 8             | Jaywalk                   |            | 6             | Dog                            |            | 3             | Biker outside lane            |
|            | 9             | Jaywalk                   | Test013    | 1             | Dog                            |            | 4             | Pedestrian reverses direction |
|            | 10            | Loitering                 |            | 2             | Loitering                      |            | 5             | Loitering                     |
|            | 11            | Loitering                 |            | 3             | Biker on sidewalk              |            | 6             | Biker outside lane            |
|            | 12            | Loitering                 |            | 4             | Dog                            |            | 7             | Biker outside lane            |
|            | 13            | Loitering                 |            | 5             | Loitering                      |            | 8             | Loitering                     |
|            | 14            | Jaywalk                   |            | 6             | Dog                            |            | 9             | Metermaid ticketing car       |
| Test006    | 1             | Person sitting on bench   |            | 7             | Loitering                      |            | 10            | Pedestrian reverses direction |
|            | 2             | Person opening trunk      |            | 8             | Loitering                      |            | 11            | Loitering                     |
|            | 3             | Jaywalk                   |            | 9             | Dog                            |            | 12            | Biker on sidewalk             |
| Test007    | 1             | Jaywalk                   |            | 10            | Loitering                      | Test019    | 1             | Person exits car on street    |
|            | 2             | Skateboarder in bike lane |            | 11            | Person opening trunk           | Test020    | 1             | Jaywalk                       |
|            | 3             | Skateboarder in bike lane | Test014    | 1             | Jaywalk                        |            | 2             | Jaywalk                       |
|            | 4             | Biker on sidewalk         |            | 1             | Car turning from parking space |            | 3             | Jaywalk                       |
| Test008    | 1             | Jaywalk                   | Test015    | 1             | Biker outside lane             | Test021    | 1             | Jaywalk                       |
|            | 2             | Jaywalk                   |            | 2             | Biker outside lane             |            | 2             | Biker outside lane            |

Table 2: List of anomalies labeled in each testing video

[5] C. Lu, J. Shi, and J. Jia. Abnormal event detection at 150 fps in matlab. In *IEEE International Conference on Computer Vision (ICCV)*, 2013. 3

[6] M. Ravanbakhsh, M. Nabi, H. Mousavi, E. Sangineto, and N. Sebe. Plug-and-play cnn for crowd motion analysis: An

application in abnormal event detection. In *IEEE Winter Conference on Applications of Computer Vision (WACV)*, 2018. 3

[7] D. Xu, E. Ricci, Y. Yan, J. Song, and N. Sebe. Learning deep representations of appearance and motion for anomalous event

| Test video | Anomaly Index | Anomaly Type       | Test video | Anomaly Index | Anomaly Type               | Test video | Anomaly Index | Anomaly Type                    |
|------------|---------------|--------------------|------------|---------------|----------------------------|------------|---------------|---------------------------------|
| Test021    | 3             | Dog                | Test025    | 4             | Biker outside lane         | Test029    | 11            | Car outside lane                |
|            | 4             | Biker outside lane |            | 5             | Biker outside lane         | Test030    | 1             | Car outside lane                |
|            | 5             | Biker outside lane |            | 6             | Biker outside lane         |            | 2             | Pedestrian reverses direction   |
|            | 6             | Jaywalk            |            | 7             | Biker on sidewalk          |            | 3             | Car outside lane                |
|            | 7             | Loitering          |            | 8             | Jaywalk                    | Test031    | 1             | Person sitting on bench         |
| Test022    | 1             | Loitering          | Test026    | 1             | Biker outside lane         |            | 2             | Biker outside lane              |
|            | 2             | Dog                |            | 2             | Biker outside lane         |            | 3             | Pedestrian reverses direction   |
|            | 3             | Loitering          |            | 3             | Car outside lane           |            | 4             | Jaywalk                         |
|            | 4             | Loitering          |            | 4             | Car outside lane           |            | 5             | Motorcycle drives onto sidewalk |
| Test023    | 1             | Dog                |            | 5             | Loitering                  | Test032    | 1             | Worker in bushes                |
|            | 2             | Biker outside lane |            | 6             | Biker on sidewalk          |            | 2             | Worker in bushes                |
|            | 3             | Car u-turn         | Test027    | 1             | Jaywalk                    |            | 3             | Pedestrian reverses direction   |
|            | 4             | Biker on sidewalk  |            | 2             | Jaywalk                    |            | 4             | Jaywalk                         |
|            | 5             | Jaywalk            |            | 3             | Jaywalk                    | Test033    | 1             | Worker in bushes                |
|            | 6             | Biker outside lane |            | 4             | Jaywalk                    |            | 2             | Jaywalk                         |
|            | 7             | Biker outside lane | Test028    | 1             | Jaywalk                    |            | 3             | Jaywalk                         |
|            | 8             | Biker outside lane |            | 2             | Biker outside lane         | Test034    | 1             | Worker in bushes                |
|            | 9             | Biker outside lane |            | 3             | Car outside lane           |            | 2             | Jaywalk                         |
|            | 10            | Biker outside lane | Test029    | 1             | Illegal parking            |            | 3             | Jaywalk                         |
| Test024    | 1             | Jaywalk            |            | 2             | Jaywalk                    |            | 4             | Worker in bushes                |
|            | 2             | Jaywalk            |            | 3             | Jaywalk                    |            | 5             | Worker in bushes                |
|            | 3             | Jaywalk            |            | 4             | Car illegally parked       |            | 6             | Worker in bushes                |
|            | 4             | Jaywalk            |            | 5             | Car outside lane           | Test035    | 1             | Jaywalk                         |
|            | 5             | Jaywalk            |            | 6             | Car outside lane           |            | 2             | Jaywalk                         |
|            | 5             | Biker outside lane |            | 7             | Car outside lane           |            | 3             | Loitering                       |
|            | 6             | Biker outside lane |            | 8             | Person exits car on street |            | 4             | Jaywalk                         |
| Test025    | 1             | Biker on sidewalk  |            | 9             | Person exits car on street |            | 5             | Loitering                       |
|            | 2             | Jaywalk            |            | 10            | Person opening trunk       |            | 6             | Pedestrian reverses direction   |
|            | 3             | Jaywalk            |            |               |                            |            |               |                                 |

Table 3: Continued list of anomalies labeled in each testing video

detection. In *British Machine Vision Conference (BMVC)*, 2015. 3
